# Supplementary material for: A Knowledge-Guided Dual-Path Framework for Automated Liver MRI Sequence Classification
Source: Research Square preprint supplement (doi:10.21203/rs.3.rs-7727538/v1), 2025-10-20
Supplement: Supplementary file 1 [file 3425b0e0bdd0b455abf93791.docx]

**External Test Dataset Construction Details**

The external test dataset (n=123) was constructed from two sources. To ensure data quality and consistency, all cases were required to meet a set of core inclusion criteria. Additionally, cases from different sources were subject to specific supplementary requirements.

**I. Core Inclusion Criteria**

All cases included in the external test set met the following conditions:

1.Clinical Indication: Patients underwent multiphase contrast-enhanced liver MRI for a standard clinical indication (e.g., surveillance for hepatocellular carcinoma in cirrhotic patients, characterization of a focal liver lesion).

2. Contrast Agent: Administration of either:

An extracellular non-specific gadolinium-based contrast agent (e.g., Gadopentetate Dimeglumine/Magnevist), or

A hepatobiliary-specific agent (Gadoxetate Disodium/Primovist or Gadobenate Dimeglumine/MultiHance).

3. Age: Patients were ≥ 18 years old.

**II. Source-Specific Criteria and Elaboration**

1. Cases from the Multicenter Study (ChiCTR**) (n = 110)

These 110 cases (comprising the 100 randomly selected cases and the 10 additional Gadoxetate Disodium cases) not only met the core criteria but also strictly adhered to all original protocols and standards of the multicenter study (including specific MRI sequence parameters and more detailed clinical criteria).

2. Retrospectively Collected Gadoxetate Disodium Cases (n = 13)

These 13 cases were retrospectively identified and collected from the PACS systems of two institutions. Their inclusion was primarily based on the core criteria, with the specific requirement of Gadoxetate Disodium use. While these cases were not required to fulfill the protocol of the multicenter study, the MRI sequences included the necessary multiphase contrast-enhanced images (pre-contrast, late arterial, portal venous, and delayed/hepatobiliary phase) for diagnostic purposes.

**III. Case Distribution Across Centers**

Table S1. Case Distribution per Contributing Center

| Center Code | Cases from multicenter study | Retrospective gadoxetate disodium cases | Total Cases Contributed |
| --- | --- | --- | --- |
| Center A | 5 |  | 5 |
| Center B | 5 |  |  |
| Center C | 5 |  |  |
| Center D | 5 |  |  |
| Center E | 5 |  |  |
| Center F | 5 |  |  |
| Center G | 5 |  |  |
| Center H | 5 |  |  |
| Center I | 5 |  |  |
| Center J | 5 |  |  |
| Center K | 5 |  |  |
| Center L | 5 |  |  |
| Center M | 5 |  |  |
| Center N | 5 |  |  |
| Center O |  | 5 |  |
| Center P | 5 |  |  |
| Center Q |  | 8 |  |
| Center R | 10 |  |  |
| Center S | 10 |  |  |
| Center T | 5 |  |  |
| Center U | 5 |  |  |
| Center V | 5 |  |  |
| Total | 110 | 13 | 123 |
